# Supplementary material for: Evidence of a reversible redox reaction in a liquid-electrolyte-type fluoride-ion battery
Source: Royal Society of Chemistry journal article supplement (doi:10.1039/d2ra05753k), 2022-01-01
Supplement: d2ra05753k1.pdf [file d2ra05753k1.pdf]

Electronic Supplementary Information (ESI) for

### Evidence of a reversible redox reaction in a liquid-electrolyte-type fluoride-ion battery

Ritsuko Yaokawa, Tohru Shiga, Shinya Moribe and Kazuhiko Mukai

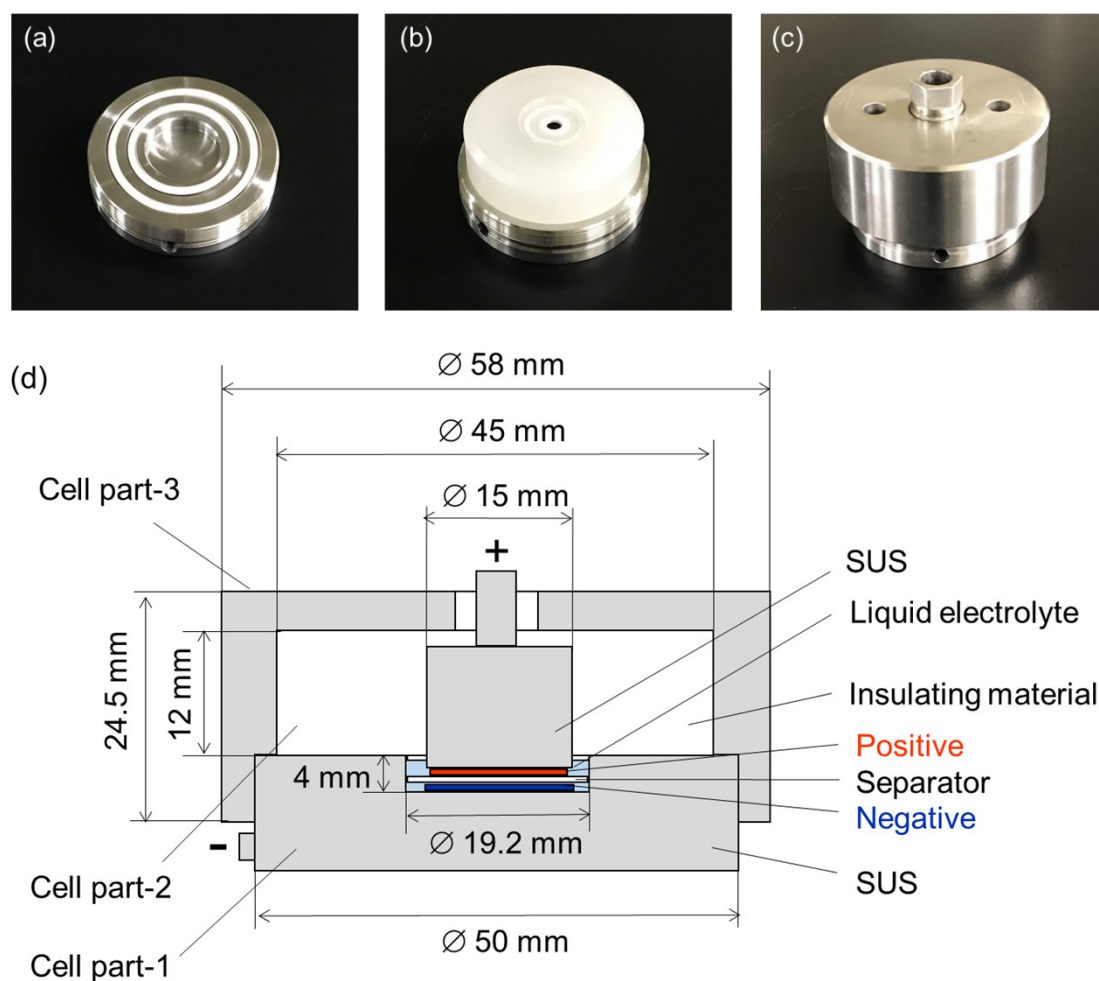

**Fig. S1:** (a)–(c) Photographs and (d) schematic structure of the hermetically sealed cell in this study. The cell consisted of stainless steel (SUS) as the outer material (parts 1 and 3), PTFE as the insulating material (part 2), and the contents of the electrodes. The diameters of the positive and negative electrodes were 14 and 16 mm, respectively. This cell was designed and fabricated in our laboratory.

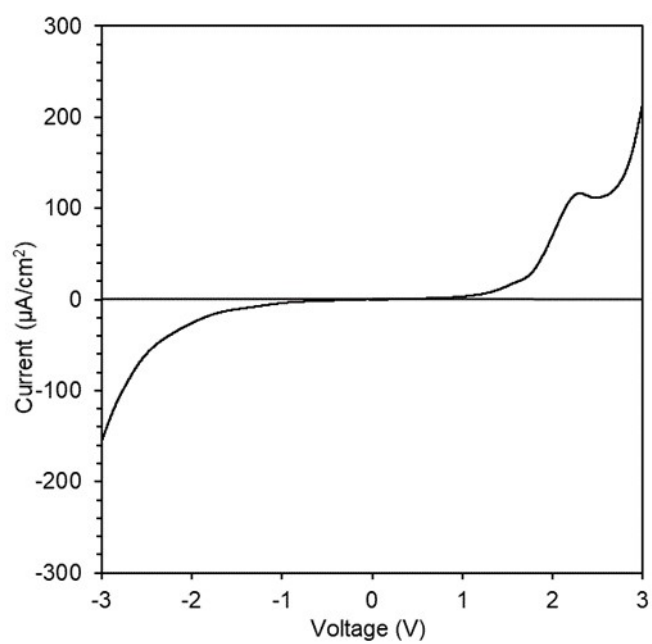

**Fig. S2:** LSV curve of the Pt|TEAF/PC|Pt cell operated at a scan rate of  $1 \text{ mV s}^{-1}$ .

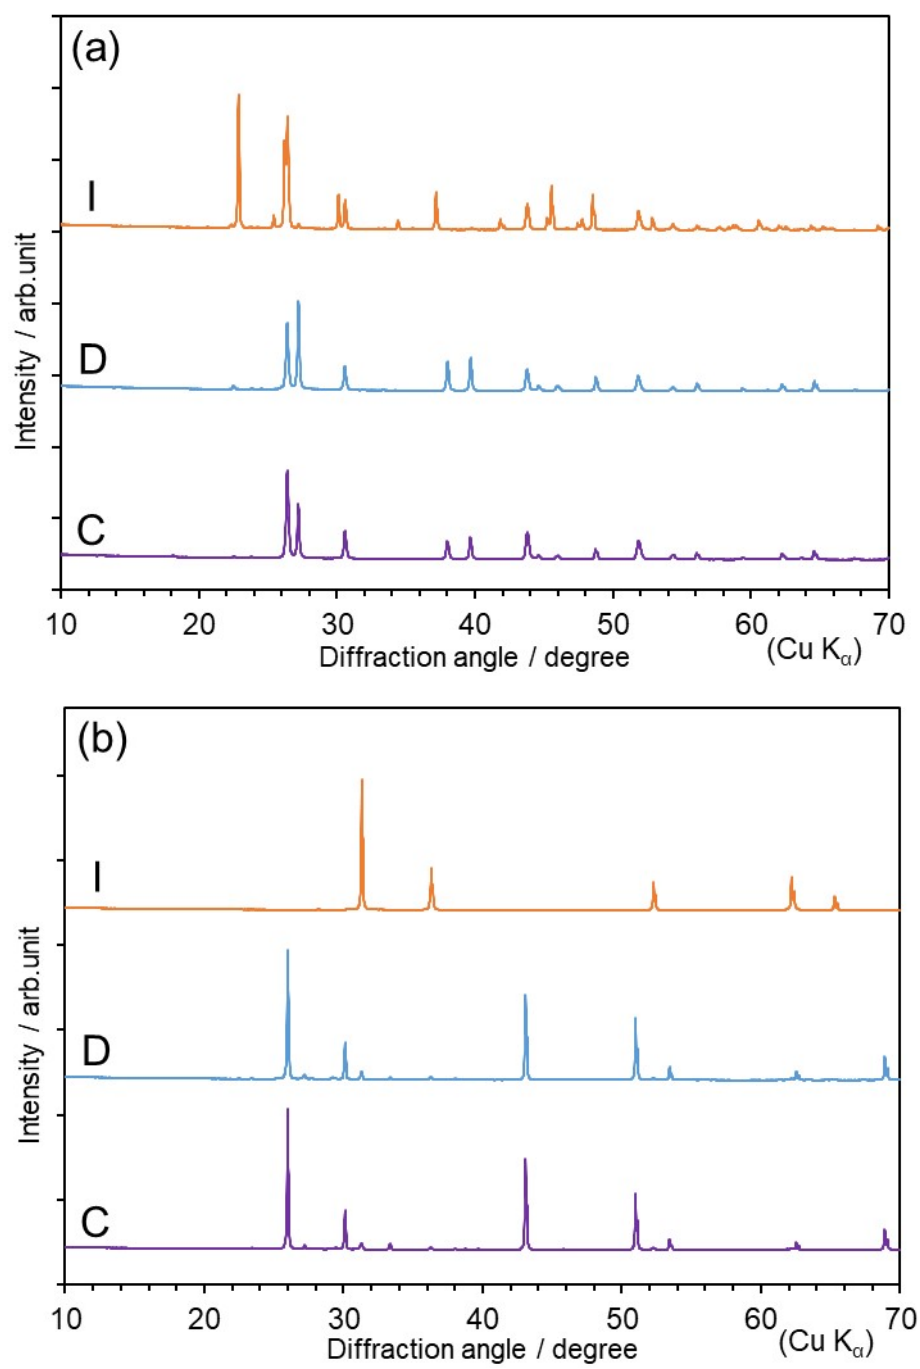

**Fig. S3:** Full- $2\theta$  range *ex situ* XRD patterns of the

BiF<sub>3</sub>|TEAF/PC|Pb-plate cell at **I**, **D**, and **C**: (a) BiF<sub>3</sub> and (b) Pb-plate electrodes. The XRD patterns in (a) and (b) are essentially same with those in Figs. 1(b) and 1(c), respectively.

**Table S1:** Lattice parameters of the BiF<sub>3</sub>, Bi, Pb, and PbF<sub>2</sub> phases calculated from the patterns for **I**, **D**, and **C** in Fig. S3, including their reported values in the ICDD database accessed using PDF-4+ 2018 software

| State           | Electrode or PDF-4+ No. | Phase            | Crystal system | Lattice parameters/Å                                                       |                                                  |
|-----------------|-------------------------|------------------|----------------|----------------------------------------------------------------------------|--------------------------------------------------|
| <b>I</b>        | positive                | BiF <sub>3</sub> | cubic          | a <sub>c</sub> = 5.827                                                     |                                                  |
|                 |                         | BiF <sub>3</sub> | orthorhombic   | a <sub>o</sub> = 6.559<br>b <sub>o</sub> = 6.951<br>c <sub>o</sub> = 4.844 |                                                  |
|                 | negative                | Pb               | cubic          | a <sub>c</sub> = 4.945                                                     |                                                  |
| <b>D</b>        | positive                | BiF <sub>3</sub> | cubic          | a <sub>c</sub> = 5.824                                                     |                                                  |
|                 |                         | Bi               | rhombohedral   | a <sub>h</sub> = 4.541<br>c <sub>h</sub> = 11.84                           |                                                  |
|                 | negative                | PbF <sub>2</sub> | cubic          | a <sub>c</sub> = 5.934                                                     |                                                  |
| <b>C</b>        | positive                | BiF <sub>3</sub> | cubic          | a <sub>c</sub> = 5.847                                                     |                                                  |
|                 |                         | Bi               | rhombohedral   | a <sub>h</sub> = 4.541<br>c <sub>h</sub> = 11.86                           |                                                  |
|                 | negative                | PbF <sub>2</sub> | cubic          | a <sub>c</sub> = 5.934                                                     |                                                  |
| Reported values | 04-007-1470             | BiF <sub>3</sub> | cubic          | a <sub>c</sub> = 5.853                                                     |                                                  |
|                 | 04-005-4815             | BiF <sub>3</sub> | orthorhombic   | a <sub>o</sub> = 6.561<br>b <sub>o</sub> = 7.015<br>c <sub>o</sub> = 4.841 |                                                  |
|                 |                         | 98-000-0118      | Bi             | rhombohedral                                                               | a <sub>h</sub> = 4.546<br>c <sub>h</sub> = 11.86 |
|                 |                         | 98-000-0279      | Pb             | cubic                                                                      | a <sub>c</sub> = 4.951                           |
|                 | 00-006-0251             | PbF <sub>2</sub> | cubic          | a <sub>c</sub> = 5.940                                                     |                                                  |

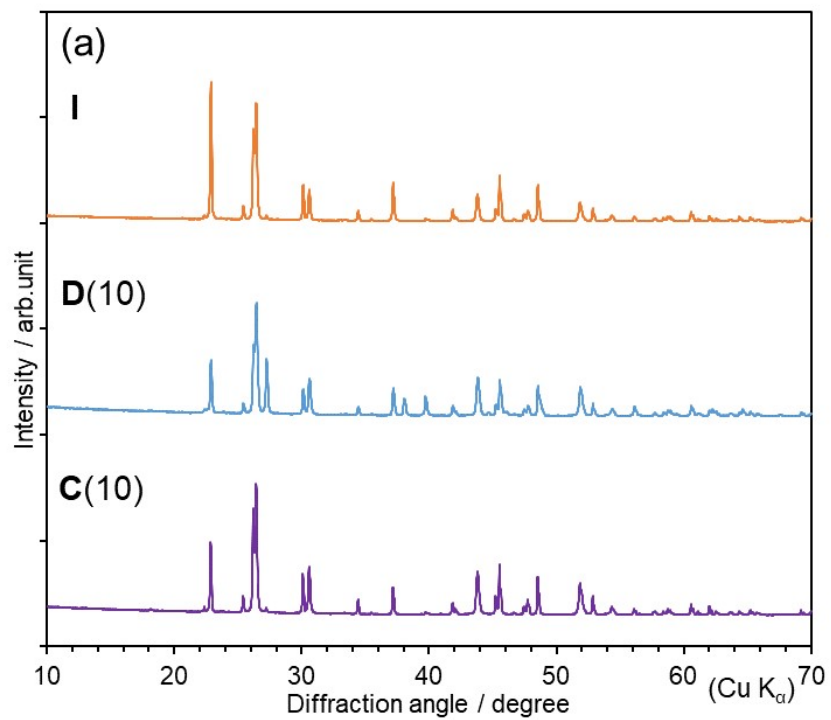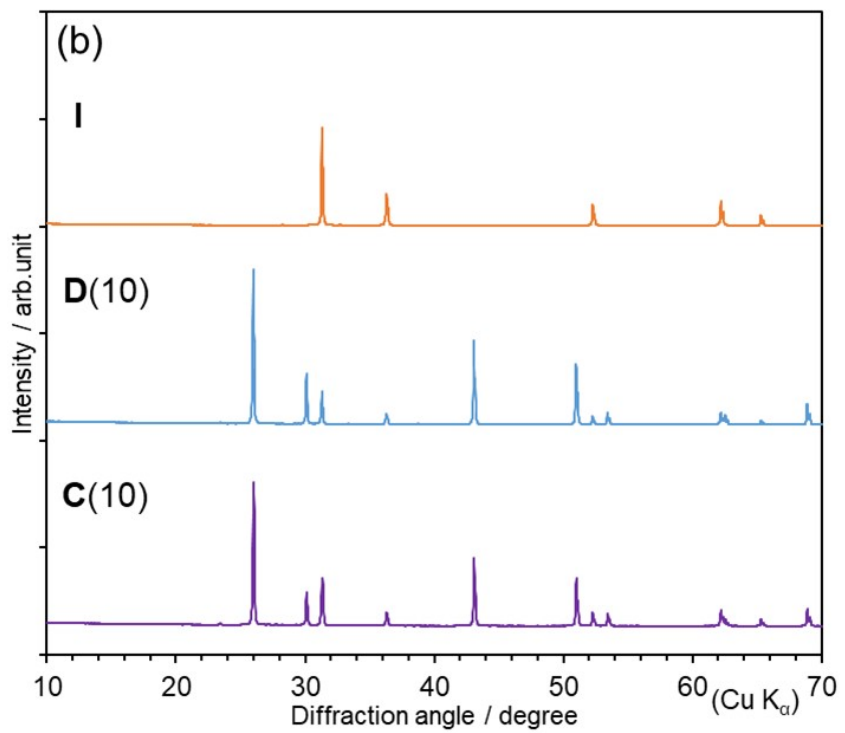

**Fig. S4:** Full- $2\theta$  range *ex situ* XRD patterns of the BiF<sub>3</sub>|TEAF/PC|Pb-plate cell at **I**, **D(10)**, and **C(10)**: (a) BiF<sub>3</sub> and (b) Pb-plate electrodes. The XRD patterns in (a) and (b) are essentially same with those in Figs. 2(b) and 2(c), respectively.

**Table S2:** Lattice parameters of the BiF<sub>3</sub>, Bi, Pb, and PbF<sub>2</sub> phases calculated from the patterns for **D(10)** and **C(10)** in Fig. S5

| State        | Electrode | Phase            | Crystal system | Lattice parameters/Å                            |
|--------------|-----------|------------------|----------------|-------------------------------------------------|
| <b>D(10)</b> | positive  | BiF <sub>3</sub> | cubic          | $a_c = 5.843$                                   |
|              |           | BiF <sub>3</sub> | orthorhombic   | $a_o = 6.555$<br>$b_o = 6.951$<br>$c_o = 4.845$ |
|              |           | Bi               | rhombohedral   | $a_h = 4.551$<br>$c_h = 11.83$                  |
|              | negative  | Pb               | cubic          | $a_c = 4.945$                                   |
|              |           | PbF <sub>2</sub> | cubic          | $a_c = 5.935$                                   |
|              |           |                  |                |                                                 |
| <b>C(10)</b> | positive  | BiF <sub>3</sub> | cubic          | $a_c = 5.824$                                   |
|              |           | BiF <sub>3</sub> | orthorhombic   | $a_o = 6.558$<br>$b_o = 6.951$<br>$c_o = 4.851$ |
|              |           |                  |                |                                                 |
|              | negative  | Pb               | cubic          | $a_c = 4.940$                                   |
|              |           | PbF <sub>2</sub> | cubic          | $a_c = 5.934$                                   |
|              |           |                  |                |                                                 |

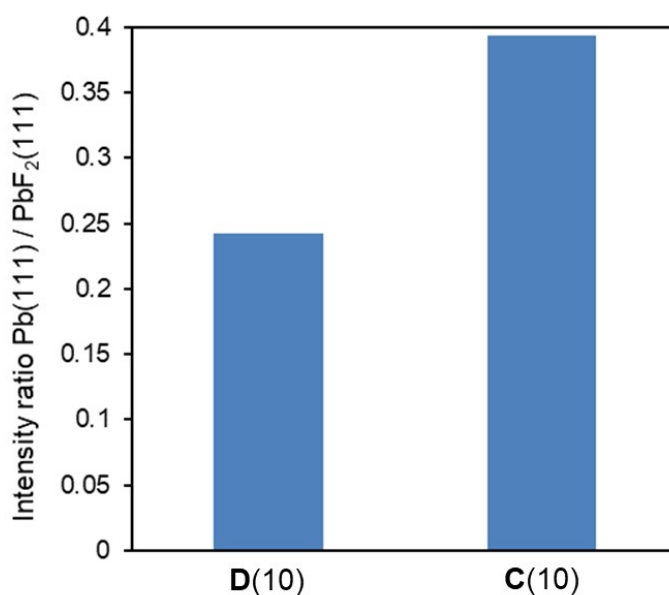

**Fig. S5:** Intensity ratios of the Pb(111) and PbF<sub>2</sub>(111) diffraction lines in Fig. 2(c).

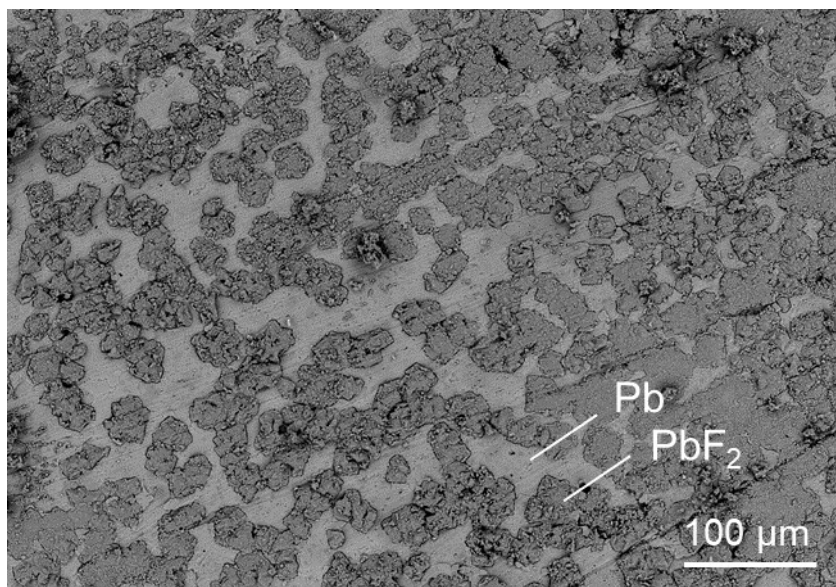

**Fig. S6:** BSE image of the Pb plate at D(10).

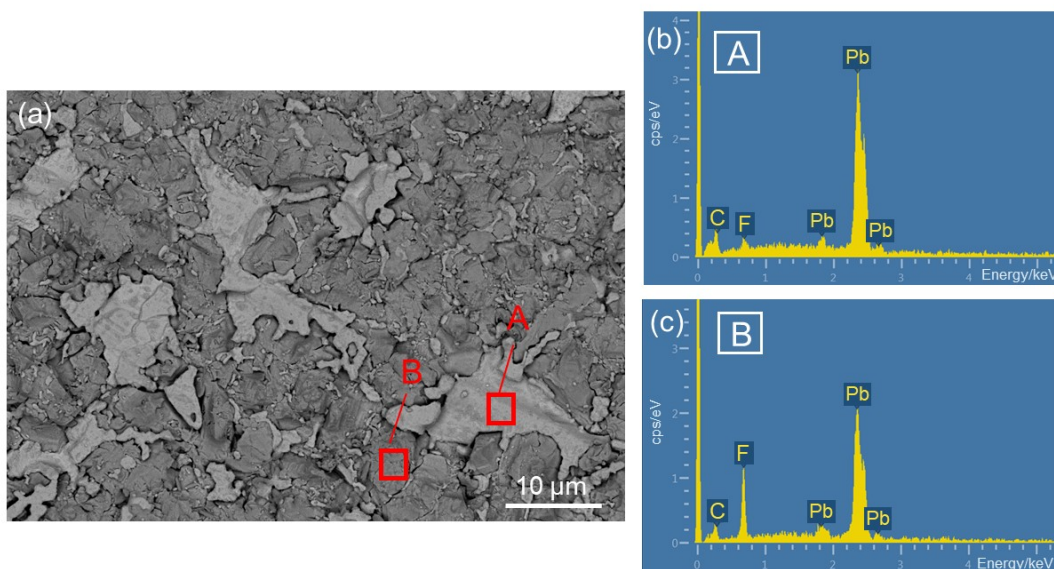

**Fig. S7:** (a) BSE image of the surface of the Pb-plate electrode at C(10). EDX spectra from the areas (b) A and (c) B in (a).

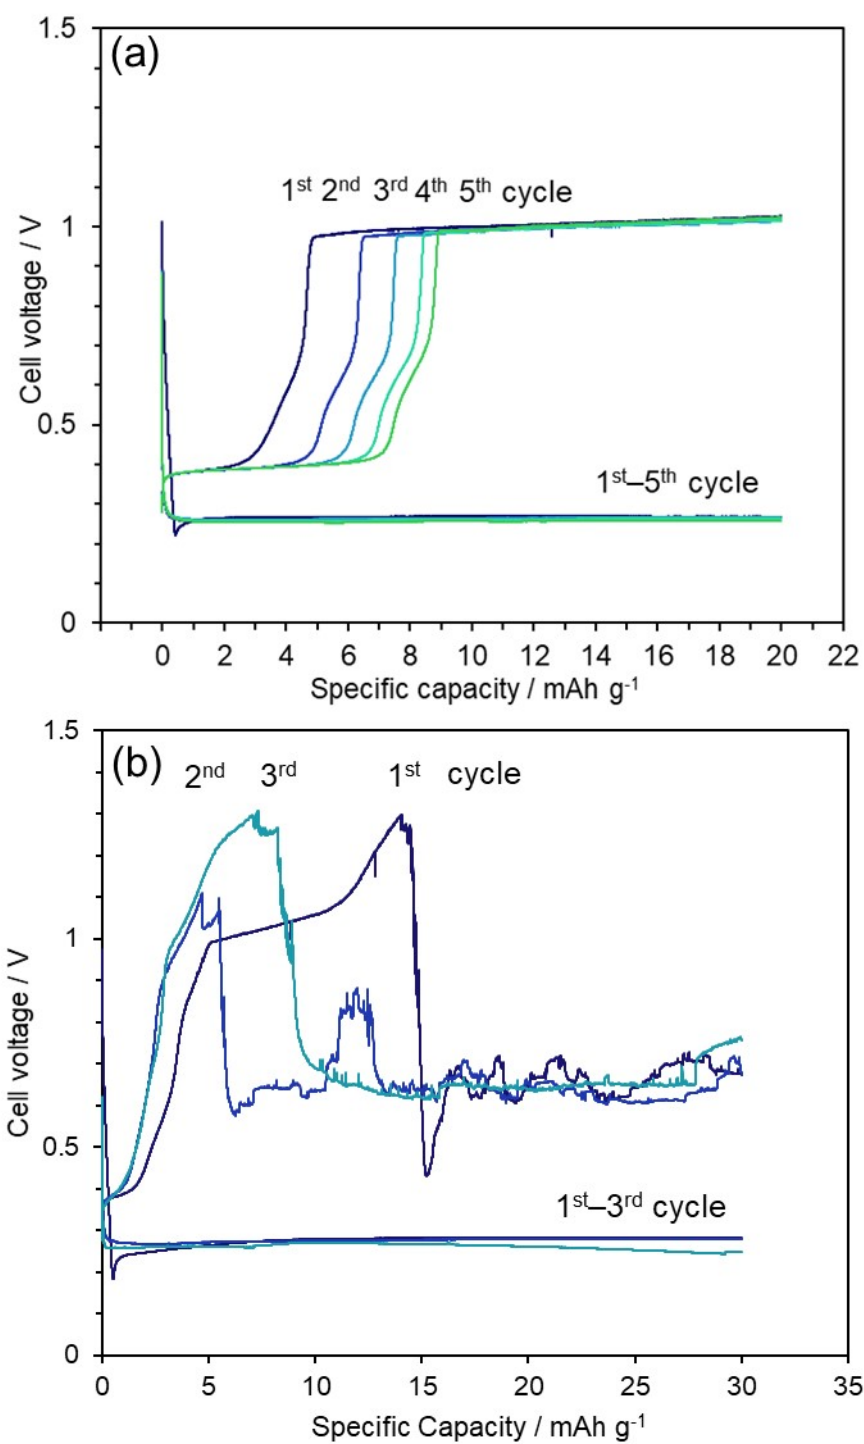

**Fig. S8:**  $Q$ -limited discharge and charge curves of the BiF<sub>3</sub>|TEAF/PC|Pb-plate cells: (a)  $Q = 20 \text{ mAh g}^{-1}$  and (b)  $Q = 30 \text{ mAh g}^{-1}$ .



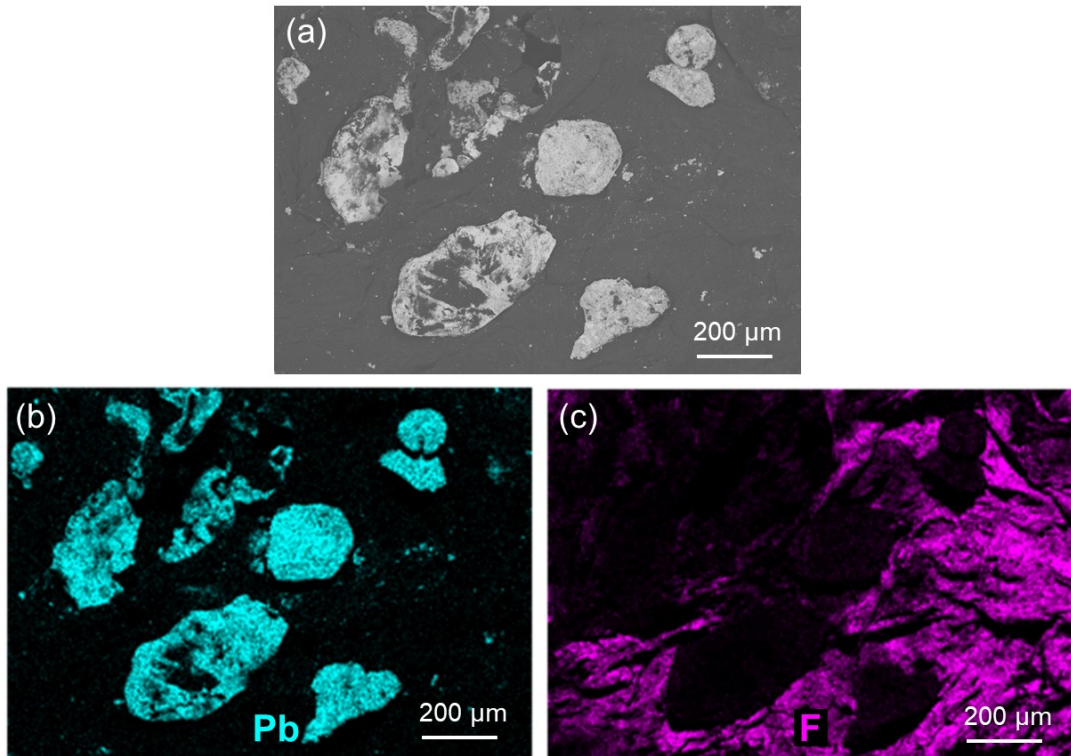

**Fig. S9:** (a) BSE image of the Pb powder at **C(rcv)** and EDX mappings of (b) Pb and (c) F.

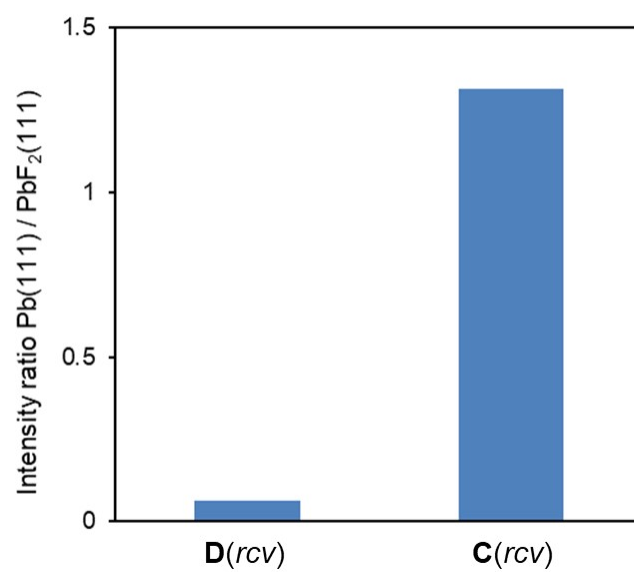

**Fig. S10:** Intensity ratios of the Pb(111) and PbF<sub>2</sub>(111) diffraction lines in Fig. 3(c).

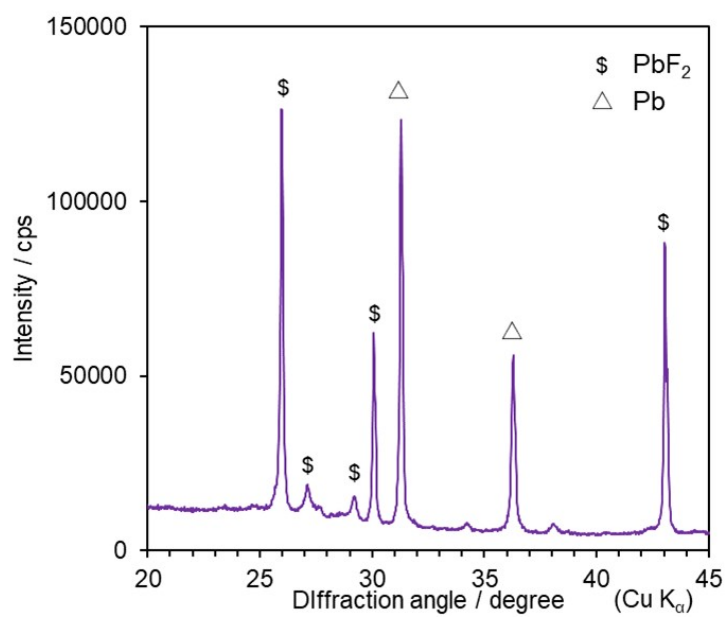

**Fig. S11:** *Ex situ* XRD pattern of the  $\alpha$ -Pb electrode from the  $\text{BiF}_3|\text{TEAF}/\text{PC}|\alpha\text{-Pb}$  cell after the discharge and charge reactions. \$ and  $\Delta$  represent the diffraction lines from the  $\text{PbF}_2$  and Pb Phases, respectively.
